# Supplementary material for: Synthesis and biological evaluation of a fatty acyl di-cytarabine prodrug
Source: Royal Society of Chemistry journal article supplement (doi:10.1039/c4ra17255h), 2015-01-01
Supplement: c4ra17255h1.pdf [file c4ra17255h1.pdf]

## Supporting Information

### Synthesis and Biological Evaluation of Fatty acyl Di-cytarabine Prodrug

Feifei Li<sup>a,b</sup>, Jing Liu<sup>a</sup>, Jiaying Shi<sup>a</sup> and Yuxia Luan<sup>a\*</sup>

<sup>a</sup>*School of Pharmaceutical Science, Shandong University, 44 West Wenhua Road, Jinan, Shandong Province, 250012, P. R. China. Fax: (86) 531-88382548; Tel: (86) 531-88382007; E-mail: yuxialuan@sdu.edu.cn*

<sup>b</sup>*Kangda College of Nanjing Medical University, No. 8 Chunhui Road, Huaguo Shan Da Dao, Xinhai District, Lianyungang, 222000, P. R. China.*

#### The analysis of <sup>1</sup>H NMR spectrum for Ara-R-Ara sample

The peak assignments of the cytarabine part are as follows. The peaks at  $\delta_{\text{H}}$  8.05 (d, 1H,  $J = 7.60$  Hz, 6-H) and  $\delta_{\text{H}}$  6.06 (d, 1H,  $J = 7.60$  Hz, 5-H) were assigned to the olefinic protons, namely, the protons of H-6, H-5. The peak appears at  $\delta_{\text{H}}$  7.21 (d, 1H, 1'-H) was attributed to the proton attached to the oxygenated N-substituted methines of the sugar ring (H-1'). Each of the cytosine ring protons (H-5 and H-6) and the H-1' proton of the arabinose moiety provided a doublet arising from the indirect spin-spin couplings with the vicinal protons. The resonances were due to the proton attached to H-5 and the H-6 overlap. For suberoyl chloride part, the peaks at  $\delta_{\text{H}}$  2.39 (t, 4H, -CO-CH<sub>2</sub>-) can be assigned to the protons of the -CO-CH<sub>2</sub>- groups. And the spectrum showed signals for a methylene at  $\delta_{\text{H}}$  1.54 (m, 4H, -CH<sub>2</sub>-), and  $\delta_{\text{H}}$  1.27 (m, 8H, -CH<sub>2</sub>-). By calculating the ratio of the integral area of peaks corresponding to cytarabine and suberoyl chloride part in <sup>1</sup>H-NMR spectrum, the molar ratio of cytarabine to suberoyl chloride in the Ara-R-Ara molecules was determined to be 2:1.
